# Supplementary material
Source: PubMed Central journal article supplement (PMC8092169)
Supplement: JB.00588-20-s0001.pdf [file JB.00588-20-s0001.pdf]

**S1 Table. Primers for plasmids construction**

| Primers                                   | Sequence (5' to 3') (restriction sites in red)                                                                                                    |
|-------------------------------------------|---------------------------------------------------------------------------------------------------------------------------------------------------|
| For shuttle vector construction           |                                                                                                                                                   |
| P311-F<br>P311-R                          | CCAATGTT <b>GCTAGC</b> GATTATTAATTCAAACGGGTC<br>CTCGCCCTTGCTCACCATGTCAAATCTCCGTTTTCAAC                                                            |
| GFP-F<br>GFP-R                            | GTTGAAAACGGAGATTTGACATGGTGAGCAAGGGCGAG<br>GAACCTGTTT <b>GGATCC</b> TACTTGTACAGCTCGTCCATG                                                          |
| P1169-F<br>P1169-R                        | CTGTACAAGTAA <b>GGATCC</b> AAACAGGTTCTCTAATTAATC<br>CAAT <b>CATATG</b> CGCTCTCCTTTCAG                                                             |
| Kan-F<br>Kan-R<br>KAN-R                   | TCTGAAAGGAGAGCG <b>CATATG</b> ATTGAACAAGATGGAT<br>GACAG <b>GGTACCT</b> TATTAGAAGAAGTTCGTCGAAGAAG<br>TTCCTAC <b>CTCGAG</b> TTAGAAGAAGTTCGTCGAAGAAG |
| Amp-F<br>Amp-R                            | ACGTCGCT <b>CTCGAG</b> TTATTACCAATGCTTAATCAGTG<br>CTAGTTAGTC <b>GCTAGCT</b> ATTTTCTCCTTACGCATCTG                                                  |
| pUC-F<br>pUC-R                            | CTTCTAATAA <b>GGTACCC</b> TGTCAGACCAAGTTTACTCAT<br>CATACTCAG <b>CTCGAG</b> GGGATAACGCAGGAAAGAAC                                                   |
| RSF1010-F<br>RSF1010-R                    | GACACGACGCAC <b>CTCGAG</b> AGTTATTGTCTTCAAATCCCGT<br>TATCTCCGCGT <b>GCTAGC</b> AGCTGTGCGGCAGCGCTCAGTAG                                            |
| pQ-F<br>pQ-R                              | GCATTGCT <b>GCTAGC</b> CAACCTCCCTTCTTTCCAATC<br>CTTCTACAT <b>CTCGAG</b> ATTCTTTGTAGAATCGCTGTC                                                     |
| For ORF deletion derivatives construction |                                                                                                                                                   |
| pQ36-NheIF<br>pQ36-NheIR                  | GCTTCATCAA <b>GCTAGC</b> AGAGGCGTTCGCTAATGACTTC<br>CCAATGTT <b>GCTAGC</b> GATTATTAATTCAAACGGGTC                                                   |
| pQ37-XbaIF<br>pQ37-XbaIR                  | TTCTATGTGACCT <b>TCTAGAT</b> CTATGATGTATCAAACCACGAG<br>CTGGACTCGTCG <b>TCTAGAT</b> TACCAGCTTGGTAGAATTTGTC                                         |
| pQ38-XbaIF<br>pQ38-XbaIR                  | AATCTATCGATC <b>TCTAGATA</b> AAGACTAAAGATGGGAAAAAGC<br>TAGCTCGATCGC <b>TCTAGAT</b> TTATATTGCCAAGTTCCTCATC                                         |
| pQ39-XbaIF<br>pQ39-XbaIR                  | CTGAAGCTCTCT <b>TCTAGACT</b> AGTGATGGATTTTGAGGTTG<br>TGTGCACATCTC <b>TCTAGAT</b> TGTAGGGTAACTCTGGATAAG                                            |
| pQ39a-XhoIF<br>pQ39a-XhoIR                | CATACTCAG <b>CTCGAG</b> GGGATAACGCAGGAAAGAAC<br>TACGAATAT <b>CTCGAG</b> AAAGTCTCCAAGAGAACATCCTG                                                   |
| For standard plasmid construction         |                                                                                                                                                   |
| dotA-NheIF<br>dotA-XhoIR                  | CTGCTAATAGT <b>GCTAGC</b> ATCCAGTGATCTTTGCCTCG<br>TCGTCTAGCAAT <b>CTCGAG</b> TCACGCCAAAAGTGTAAGCAT                                                |
| cbua37-XhoIF<br>cbua37-PciIR              | CAAGTGCTCGA <b>CTCGAG</b> TGAAGAAAATGAGAACGGAAGG<br>TCGTCTCACGAA <b>ACATGT</b> CATAGATCGTTCCTATTTCAATTG                                           |
| For Q-PCR                                 |                                                                                                                                                   |
| QdotA-F<br>QdotA-R<br>Probe               | GCGCAATACGCTCAATCACA<br>CCATGGCCCCAATTCTCTT<br>CCGGAGATACCGGCGGTGGG                                                                               |
| QCb37-F<br>QCb37-R<br>Probe               | TCCTGAGCTTATAAGGGTTGC<br>GATTTAGGTAAAAAATAGCCATTG<br>CTTGAGCATCAAAGTCGAGAAGGAGGGAAC                                                               |

## S2 Appendix. Complete sequence of the pMMGK plasmid

CTCGAGTTAGAAGAACTCGTCAAGAAGGCGATAGAAGGCGATGCGCTGCGAATC  
GGGAGCGGCGATACCGTAAAGCACGAGGAAGCGGTCAGCCCATTCCGCCCAAG  
CTCTTCAGCAATATCACGGGTAGCCAACGCTATGTCTTGATAGCGGTCCGCCACA  
CCCAGCCGGCCACAGTCGATGAATCCAGAAAAGCGGCCATTTTCCACCATGATAT  
TCGGCAAGCAGGCATCGCCATGGGTACGACGAGATCCTCGCCGTCGGGCATGC  
GCGCCTTGAGCCTGGCGAACAGTTCGGCTGGCGCGAGCCCCTGATGCTCTTCGTC  
CAGATCATCCTGATCGACAAGACCGGCTCCATCCGAGTACGTGCTCGCTCGATG  
CGATGTTTCGCTTGGTGGTCAATGGGCAGGTAGCCGGATCAAGCGTATGCAGCC  
GCCGCATTGCATCAGCCATGATGGATACTTTCTCGGCAGGAGCAAGGTGGGATGA  
CAGGAGATCCTGCCCCGGCACTTCGCCCAATAGCAGCCAGTCCCTTCCCCTTCA  
GTGACAACGTCGAGCACAGCTGCGCAAGGAACGCCCGTCGTGGCCAGCCACGAT  
AGCCGCGCTGCCTCGTCCTGCAGTTCATTCAGGGCACCGGACAGGTTCGGTCTTGA  
CAAAAAGAACCGGGCGCCCCTGCGCTGACAGCCGGAACACGGCGGCATCAGAGC  
AGCCGATTGTCTGTTGTGCCAGTCATAGCCGAATAGCCTCTCCACCCAAGCGGC  
CGGAGAACCCTGCGTGCAATCCATCTTGTCAATCATATGCGCTCTCCTTTCAGAA  
GGATTAATGTCATTATTTATTTATGGGGTATGGAGAGGGATATTTCAAGGCGCAC  
AAATATGATTCCAGGCTCGTTCTGCGGTTCCGCCTGGGTGTTTCGCTGAGATAGGT  
TTTTACTTCGTTATACGAAAGCGGCGAATCGCCAAAAATTTTTTTTCCAAGTTCG  
TGCGAAACGAAGCCATTTCCCGAAGAAGTATGTGCCAAGTGTGTTGTAGGTTTTGT  
TAAAATTTTCTAATAAGGATAATAGTTCATTGCACTTGTCCGTCACAAAGTTATT  
TTATCCACAAAAATTTGCCTACTAGGCCCTCCATTTCCAGGAGATAAGAACGCAT  
CATTTATCCATTTGAGTTTTTGGAAATGGTAAAGTTTTTAAAAAATCATCTATCTCT  
GAGGTTTTCTTTAGATAGAAGCTTTGGTAGAAAAACATTGTCCGGATTAATTAGAG  
AACCTGTTTGGATCCTTACTTGTACAGCTCGTCCATGCCGAGAGTGATCCCAGGCG  
GCGGTCACGAACTCCAGCAGGACCATGTGATCGCGCTTCTCGTTGGGGTCTTTGC  
TCAGGGCGGACTGGGTGCTCAGGTAGTGGTTGTCCGGCAGCAGCACGGGGCCGT  
CGCCGATGGGGGTGTTCTGCTGGTAGTGGTCCGGCAGCTGCACGCTGCCGTCTC  
GATGTTGTGGCGGATCTTGAAGTTCACCTTGATGCCGTCTTCTGCTTGTCCGCCA  
TGATATAGACGTTGTGGCTGTTGTAGTTGTACTIONTCCAGCTTGTGCCCCAGGATGTTG  
CCGTCTCCTTGAAGTCGATGCCCTTCCAGCTCGATGCCGTTCCACCAGGGTGTCCG  
CCTCGAACTTACCTCGGCGCGGGTCTTGTAGTTGCCGTCGTCCTTGAAGAAGAT  
GGTGGCTCCTGGACGTAGCCTTCGGGCATGGCCGACTTGAAGAAGTCGTGCTGC  
TTCATGTGGTCGGGGTAGCGGCTGAAGCACTGCACGCCGTAGGTCAGGGTGGTCA  
CGAGGGTGGGCCAGGGCACGGCAGCTTGCCGGTGGTGCAGATGAACTTCAGGG  
TCAGCTTGCCGTAGGTGGCATCGCCCTCGCCCTCGCCGGACACGCTGAACTTGTG  
GCCGTTTACGTCGCCGTCCAGCTCGACCAGGATGGGCACCACCCCGGTGAACAGC  
TCCTCGCCCTTGCTCACCATGTCAAATCTCCGTTTTCAACTAAAGTTAAAACAAAA  
TCAAATAAAGCCTATATTTAAGCCTATCTTAGCTTTTTCTCAAAGCTATAAAATGA  
AGAATATCGATATCTTTTTTAAATGTCAACACTTAAATCCCATAAAATCATTAAA  
ATAAGAAAAATCTAAGCTTCTACCGATAATTAAGGATATTCAATTACAAAAAAA  
AAATGCCCATTAATTAACAATCCGTTTAATTAATGGGCATTTGCTTTCTATTTTG  
TGTAATTAGGAATCTAATAATAATTCATTTAGCCCTTTCACAAAACCTGGCAGGGT  
CTTTAAGCTGCTCTCCTTCCAGCTAGGAGCGCTTGATTAAGCAATAAATCGGCCCA  
ACGATTAAGCGTGTTTTATCAGATTCATTTTTACCCGTAATAAAGGGGTGC  
GATGGATTAATTTCTAAAATAGGTTTTGCCTGCATGAAATCCTGACCCGTTTGAAT  
TAATAATCGCTAGCAGCTGTGCGGCAGCGCTCAGTAGGCAATTTTTCAAATATT  
GTTAAGCCTTTTCTGAGCATGGTATTTTTCATGGTATTACCAATTAGCAGGAAAT  
AAGCCATTGAATATAAAAAGATAAAAATGTCTTGTTTACAATAGAGTGGGGGGGG  
TCAGCTGCGCCTTGGGCCGGGTGATGTCGTACTIONTGGCCGCGCAACTCGGTT  
ACCGTCCAGCCCAGCGCGACCAGCTCCGGCAACGCCTCGCGCACCCGCTTGCGGC  
GCTTGCAGATGGTTCGAACCACTGGCCTCTGACGGCCAGACATAGCCGCACAAGGT  
ATCTATGGAAGCCTTGCCGGTTTTGCCGGGGTTCGATCCAGCCACACAGCCGCTGG

TGCAGCAGGCGGGCGGTTTCGCTGTCCAGCGCCCCGCACCTCGTCCATGCTGATGC  
GCACATGCTGGCCGCCACCCATGACGGCCTGCGCGATCAAGGGGTTTCAGGGCCA  
CGTACAGGCGCCCGTCCGCCTCGTCGCTGGCGTACTCCGACAGCAGCCGAAACCC  
CTGCCGCTTGCGGCCATTCTGGGCGATGATGGATACCTTCCAAAGGCGCTCGATG  
CAGTCCTGTATGTGCTTGAGCGCCCCACCACTATCGACCTCTGCCCCGATTTCCCTT  
TGCCAGCGCCCCGATAGCTACCTTTGACCACATGGCATTTCAGCGGTGACGGCCTCC  
CACTTGGGTTCCAGGAACAGCCGGAGCTGCCGTCCGCCTTCGGTCTTGGGTTCCG  
GGCCAAGCACTAGGCCATTAGGCCAGCCATGGCCACCAGCCCTTGCAGGATGC  
GCAGATCATCAGCGCCCAGCGGCTCCGGGCCGCTGAACTCGATCCGCTTGCCGTC  
GCCGTAGTCATACGTACGTCCAGCTTGCTGCGCTTGCCTCGCCCCGCTTGAGG  
GCACGGAACAGGCCGGGGCCAGACAGTGCGCCGGTTCGTGCCGGACGTGGCTG  
AGGCTGTGCTTGTCTTAGGCTTACCACGGGGCACCCCTTGCTCTTGCGCTGCC  
TCTCCAGCACGGCGGGCTTGAGCACCCCGCCGTCATGCCGCCTGAACCACCGATC  
AGCGAACGGTGCGCCATAGTTGGCCTTGCTCACACCGAAGCGGACGAAGAACC  
GCGCTGGTTCGTCCACACCCCATTCCTCGGCCTCGGCGCTGGTTCATGCTCGAC  
AGGTAGGACTGCCAGCGGATGTTATCGACCAGTACCGAGCTGCCCCGGCTGGCCT  
GCTGCTGGTTCGCTCGCCCATCATGGCCGCGCCCTTGCTGGCATGGTGCAGGAA  
CACGATAGAGCACCCGGTATCGGCGGCGATGGCCTCCATGCGACCGATGACCTG  
GGCCATGGGGCCGCTGGCGTTTTCTTCTCGATGTGGAACCGGCGCAGCGTGTCC  
AGCACCATCAGGCGGGCCCTCGGCGGCGCGCTTGAGGCCGTCGAACCACTCC  
GGGGCCATGATGTTGGGCAGGCTGCCGATCAGCGGCTGGATCAGCAGGCCGTC  
GCCACGGCTTGCCGTTCTCGGCGCTGAGGTGCGCCCCAAGGGCGTGCAGGCGGT  
GATGAATGGCGGTGGGCGGGTCTTCGGCGGGCAGGTAGATCACCGGGCCGGTGG  
GCAGTTCGCCACCTCCAGCAGATCCGGCCCCGCTGCAATCTGTGCGGCCAGTTG  
CAGGGCCAGCATGGATTTACCGGCACCACCGGGCGACACCAGCGCCCCGACCGT  
ACCGGCCACCATGTTGGGCAAACGTAGTCCAGCGGTGGCGGCGCTGCTGCGAA  
CGCTCCAGAATATTGATAGGCTTATGGGTAGCCATTGATTGCCTCCTTTGCAGG  
CAGTTGGTGGTTAGGCGCTGGCGGGGTCCTACCCCGCCCTGCGCCGCTCTGAG  
TTCTTCCAGGCACTCGCGCAGCGCCTCGTATTTCGTGCTCGGTTCAGCCAGA  
ACTTGCGCTGACGCATCCCTTTGGCCTTCATGCGCTCGGCATATCGCGCTTGGCGTACAG  
CGTCAGGGCTGGCCAGCAGGTCGCCGGTCTGCTTGTCTTTTGGTCTTTCATATCA  
GTCACCGAGAACTTGCCGGGGCCGAAAGGCTTGTCTTCGCGGAACAAGGACAA  
GGTGCAGCCGTC AAGGTTAAGGCTGGCCATATCAGCGACTGAAAAGCGGCCAGC  
CTCGGCCTTGTTTGACGTATAACCAAAGCCACCGGGCAACCAATAGCCCTTGTC  
CTTTTGATCAGGTAGACCGACCCTGAAGCGCTTTTTTTCGTATTCCATAAAACCCC  
TTCTGTGCGTGAGTACTCATAGTATAACAGGCGTGAGTACCAACGCAAGCACTAC  
ATGCTGAAATCTGGCCCCGCCCTGTCCATGCCTCGCTGGCGGGGTGCCGGTGCCC  
GTGCCAGCTCGGCCCGCGCAAGCTGGACGCTGGGCAGACCCATGACCTTGCTGAC  
GGTGCCTCGATGTAATCCGCTTCGTGGCCGGGCTTGCCTCTGCCAGCGCTGGG  
CTGGCCTCGGCCATGGCCTTGCCGATTTCTCGGCACTGCGGCCCGGCTGGCCA  
GCTTCTGCGCGGCGATAAAGTCGCACTTGCTGAGGTCATGACCGAAGCGCTTGAC  
CAGCCCGGCCATCTCGCTGCGGTAATCGTCCAGCGCCGTGCGCCGGTGGCGGCTA  
AGCTGCCGCTCGGGCAGTTCGAGGCTGGCCAGCCTGCGGGCCTTCTCCTGCTGCC  
GCTGGGCCTGCTCGATCTGCTGGCCAGCCTGCTGCACCAGCGCCGGGCCAGCGGT  
GGCGGTCTTGCCCTTGATTACAGCAGCAGCACCCACGGCTGATAACCGGCGCGG  
GTGGTGTGCTTGTCTTGCAGTTGGTGAAGCCCGCCAAGCGGCCATAGTGGCGGC  
TGTCGGCGCTGGCCGGGTCGGCGTCGTAATCGCTGGCCAGCGTCCGGGCAATCTG  
CCCCGAAGTTCACCGCCTGCGGCGTCGGCCACCTTGACCCATGCCTGATAGTTC  
TTCGGGCTGGTTTCCACTACCAGGGCAGGCTCCCGGCCCTCGGCTTTCATGTCATC  
CAGGTCAAACCTCGCTGAGGTCGTCCACCAGCACCCAGACCATGCCGCTCCTGCTCG  
GCGGGCCTGATATACAGTCATTGCCCTGGGCATTTCATCCGCTTGAGCCATGGCG  
TGTTCTGGAGCACTTCGGCGGCTGACCATTCGGGTTTCATCATCTGGCCGGTGGG  
TGCGTCCCTGACGCCGATATCGAAGCGCTCACAGCCCATGGCCTTGAGCTGTCCG  
CCTATGGCCTGCAAAGTCCTGTCTGTTCTTCATCGGGCCACCAAGCGCAGCCAGAT  
CGAGCCGTCCTCGGTTGTCAGTGGCGTCAGGTTCGAGCAAGAGCAACGATGCGAT

CAGCAGCACCACCGTAGGCATCATGGAAGCCAGCATCACGGTTAGCCATAGCTTC  
CAGTGCCACCCCGCGACGCGCTCCGGGCGCTCTGCGCGGCGCTGCTCACCTCGG  
CGGCTACCTCCCGCAACTCTTTGGCCAGCTCCACCCATGCCGCCCTGTCTGGCGC  
TGGGCTTTCAGCCACTCCGCCGCTGCGCCTCGCTGGCCTGCTTGGTCTGGCTCAT  
GACCTGCCGGGCTTCGTCGGCCAGTGTGCCATGCTCTGGGCCAGCGGTTGATC  
TGCTCCGCTAACTCGTTGATGCCTCTGGATTTCTTCACTCTGTGCGATTGCGTTCAT  
GGTCTATTGCCTCCCGGTATTCTGTAAAGTCGATGATCTGGGCGTTGGCGGTGTCG  
ATGTTTCAGGGCCACGTCTGCCCGGTGCGTGCGGATGCCCGGCCCTTCCATCTCCA  
CCACGTTCCGGCCCCAGGTGAACACCGGGCAGGCGCTCGATGCCCTGCGCCTCAAG  
TGTTCTGTGGTCAATGCGGGCGTCGTGGCCAGCCCGCTCTAATGCCCGGTTGGCA  
TGGTCGGCCCATGCCTCGCGGGTCTGCTCAAGCCATGCCTTGGGCTTGAGCGCTT  
CGGTCTTCTGTGCCCGCCCTTCTCCGGGGTCTTGCCGTTGTACCGCTTGAACCAC  
TGAGCGGCGGGCCGCTCGATGCCGTCATTGATCCGCTCGGAGATCATCAGGTGGC  
AGTGCGGGTTCTCGCCGCCACCGGCATGGATGGCCAGCGTATACGGCAGGCGCTC  
GGCACCGGTCAGGTGCTGGGCGAACTCGGACGCCAGCGCCTTCTGCTGGTTCGAG  
GGTCAGCTCGACCGGCAGGGCAAATTCGACCTCCTTGAACAGCCGCCATTGGCG  
CGTTCATACAGGTCCGCAGCATCCCAGTAGTCGGCGGGCCGCTCGACGAACTCCG  
GCATGTGCCCGGATTCGGCGTGCAAGACTTCATCCATGTGCGGGGCATACTTGCC  
TTCGCGCTGGATGTAGTCGGCCTTGGCCCTGGCCGATTGGCCGCCCGACCTGCTG  
CCGGTTTTTCGCCGTAAGGTGATAAATCGCCATGCTGCCTCGCTGTTGCTTTTGCTT  
TTCGGTCCATGCAATGGCCCTCGGAGAGCGCACCGCCCGAAGGGTGGCCGTTAG  
GCCAGTTTCTCGAAGAGAAACCGGTAAGTGCGCCCTCCCCTACAAAGTAGGGTCG  
GGATTGCCGCCGCTGTGCCTCCATGATAGCCTACGAGACAGCACATTAACAATGG  
GGTGTCAAGATGGTTAAGGGGAGCAACAAGGCGGCGGATCGGCTGGCCAAGCTC  
GAAGAACAACGAGCGCGAATCAATGCCGAAATTCAGCGGGAGCGGGCAAGGGA  
ACAGCAGCAAGAGCGCAAGAACGAAACAAGGCGCAAGGTGCTGGTGGGGGCCA  
TGATTTTGGCCAAGGTGAACAGCAGCGAGTGGCCGGAGGATCGGCTCATGGCGG  
CAATGGATGCGTACCTTGAACGCGACCACGACCGCGCCTTGTTCCGGTCTGCCGCC  
ACGCCAGAAGGATGAGCCGGGCTGAATGATCGACCGAGACAGGCCCTGCGGGGC  
TGCACACGCGCCCCACCCTTCGGGTAGGGGGAAGGCCGCTAAAGCGGCTAAA  
AGCGCTCCAGCGTATTTCTGCGGGGTTTGGTGTGGGGTTTAGCGGGCTTTGCCCG  
CCTTTCCCCCTGCCGCGCAGCGGTGGGGCGGTGTGTAGCCTAGCGCAGCGAATAG  
ACCAGCTATCCGGCCTCTGGCCGGGCATATTGGGCAAGGGCAGCAGCGCCCCAC  
AAGGGCGCTGATAACCGCGCCTAGTGGATTATTCTTAGATAATCATGGATGGATT  
TTCCAACACCCCGCCAGCCCCCGCCCCTGCTGGGTTTGCAGGTTTGGGGGCGTG  
ACAGTTATTGCAGGGGTTTCGTGACAGTTATTGCAGGGGGGCGTGACAGTTATTGC  
AGGGGTTTCGTGACAGTTAGTACGGGAGTGACGGGCACTGGCTGGCAATGTCTAG  
CAACGGCAGGCATTTCCGGCTGAGGGTAAAAGAACTTTCCGCTAAGCGATAGACT  
GTATGTAAACACAGTATTGCAAGGACGCGGAACATGCCTCATGTGGCGGCCAGG  
ACGGCCAGCCGGGATCGGGATACTGGTCGTTACCAGAGCCACCGACCCGAGCAA  
ACCCTTCTCTATCAGATCGTTGACGAGTATTACCCGGCATTTCGCTGCGCTTATGGC  
AGAGCAGGGAAAGGAATTGCCGGGCTATGTGCAACGGGAATTTGAAGACAATAA  
CT

### S3 Appendix. Complete sequence of the pQK plasmid

CTCGAGGGGATAACGCAGGAAAGAACATGTGAGCAAAAGGCCAGCAAAAGGCC  
AGGAACCGTAAAAAGGCCGCGTTGCTGGCGTTTTTCCATAGGCTCCGCCCCCTG  
ACGAGCATCACAAAATCGACGCTCAAGTCAGAGGTGGCGAAACCCGACAGGAC  
TATAAAGATACCAGGCGTTTTCCCCCTGGAAGCTCCCTCGTGCGCTCTCCTGTTCCG  
ACCCTGCCGCTTACCGGATACCTGTCCGCTTTCTCCCTTCGGGAAGCGTGGCGCT  
TTCTCATAGCTCACGCTGTAGGTATCTCAGTTCGGTGTAGGTCGTTGCTCCAAGC  
TGGGCTGTGTGCACGAACCCCCGTTTCAGCCCCGACCGCTGCGCCTTATCCGGTAA  
CTATCGTCTTGAGTCCAACCCGGTAAGACACGACTTATCGCCACTGGCAGCAGCC  
ACTGGTAACAGGATTAGCAGAGCGAGGTATGTAGGCGGTGCTACAGAGTTCTTG  
AAGTGGTGGCCTAACTACGGCTACACTAGAAGAACAGTATTTGGTATCTGCGCTC  
TGCTGAAGCCAGTTACCTTCGGAAAAAGAGTTGGTAGCTCTTGATCCGGCAAACA  
AACCACCGCTGGTAGCGGTGGTTTTTTTTGTTTGCAAGCAGCAGATTACGCGCAGA  
AAAAAAGGATCTCAAGAAGATCCTTTGATCTTTTCTACGGGGTCTGACGCTCAGT  
GGAACGAAAACCTCACGTTAAGGGATTTTGGTTCATGAGATTATCAAAAAGGATCTT  
CACCTAGATCCTTTTAAATTA AAAATGAAGTTTTAAATCAATCTAAAGTATATAT  
GAGTAAACTTGGTCTGACAGGGTACCTTATTAGAAGAACTCGTCAAGAAGGCGA  
TAGAAGGCGATGCGCTGCGAATCGGGAGCGGCGATACCGTAAAGCACGAGGAAG  
CGGTCAGCCATTTCGCCGCAAGCTCTTCAGCAATATCACGGGTAGCCAACGCTA  
TGTCTGATAGCGGTCCGCCACACCCAGCCGGCCACAGTCGATGAATCCAGAAA  
AGCGGCCATTTTCCACCATGATATTCGGCAAGCAGGCATCGCCATGGGTACAGAC  
GAGATCCTCGCCGTCGGGCATGCGCGCCTTGAGCCTGGCGAACAGTTCGGCTGGC  
GCGAGCCCCTGATGCTCTTCGTCCAGATCATCTGATCGACAAGACCGGCTTCCA  
TCCGAGTACGTGCTCGCTCGATGCGATGTTTCGCTTGGTGGTTCGAATGGGCAGGT  
AGCCGGATCAAGCGTATGCAGCCGCCGATTGCATCAGCCATGATGGATACTTTC  
TCGGCAGGAGCAAGGTGGGATGACAGGAGATCCTGCCCCGGCACTTCGCCCAAT  
AGCAGCCAGTCCCTTCCCGCTTCAGTGACAACGTCGAGCACAGCTGCGCAAGGA  
ACGCCCCTCGTGGCCAGCCACGATAGCCGCGCTGCCTCGTCTGCAGTTCATTCA  
GGGCACCGGACAGGTTCGGTCTTGACAAAAAGAACCGGGGCGCCCCTGCGCTGACA  
GCCGGAACACGGCGGCATCAGAGCAGCCGATTGTCTGTTGTGCCCAGTCATAGCC  
GAATAGCCTCTCCACCAAGCGGCCGGAGAACCTGCGTGCAATCCATCTTGTTCA  
ATCATATGCGCTCTCCTTTCAGAAGGATTAATGTCATTATTTATTTATGGGGTATG  
GAGAGGGATATTTCAAGGCGCACAAATATGATTCCAGGCTCGTTCTGCGGTTCCG  
CCTGGGTGTTTCGCTGAGATAGGTTTTTACTTCGTTATACGAAAGCGGCGAATCGC  
CAAAAATTTTTTTTCCAAGTTCGCTGCGAAACGAAGCCATTTCCCGAAGAAGTAT  
GTGCCAAGTGTGTTGAGGTTTTGTTAAAATTTTCTAATAAGGATAATAGTTCATTG  
CACTTGTCCGTCACAAAGGTTATTTTATCCACAAAAAATTTGCCTACTAGGCCCTC  
CATTTACAGGAGATAAGAACGCATCATTTATCCATTTGAGTTTTTGAATGGTAAA  
GTTTTTAAAAAATCATCTATCTCTGAGGTTTCTTTAGATAGAAGCTTTGGTAGAAA  
AACATTGTCCGATTAATTAGAGAACCTGTTTGGATCCTTACTTGTACAGCTCGTC  
CATGCCGAGAGTGATCCCGGCGGCGGTCACGAACTCCAGCAGGACCATGTGATC  
GCGCTTCTCGTTGGGGTCTTTGCTCAGGGCGGACTGGGTGCTCAGGTAGTGGTTG  
TCGGGCAGCAGCACGGGGCCGTCGCCGATGGGGGTGTTCTGCTGGTAGTGGTCG  
GCGAGCTGCACGCTGCCGTCCTCGATGTTGTGGCGGATCTTGAAGTTCACCTTGA  
TGCCGTTCTTCTGCTTGTGCGCCATGATATAGACGTTGTGGCTGTTGTAGTTGTAC  
TCCAGCTTGTGCCCCAGGATGTTGCCGTCCTCCTTGAAGTCGATGCCCTTCAGCTC  
GATGCGGTTACACAGGGTGTGCCCCGAACTTCACCTCGGCGCGGGTCTTGAG  
TTGCCGTCGTCCTTGAAGAAGATGGTGCCTCCTGGACGTAGCCTTCGGGCATGG  
CGGACTTGAAGAAGTCGTGCTGCTTCATGTGGTTCGGGGTAGCGGCTGAAGCACTG  
CACGCCGTAGGTCAGGGTGGTCACGAGGGTGGGCCAGGGCACGGGCAGCTTGCC  
GGTGGTGCAGATGAACTTCAGGGTCAGCTTGCCGTAGGTGGCATCGCCCTCGCCC  
TCGCCGGACACGCTGAACTTGTGGCCGTTTACGTCGCCGTCAGCTCGACCAGGA  
TGGGCACCACCCGGTGAACAGCTCCTCGCCCTTGTCCACCATGTCAAATCTCCG

TTTTCAACTAAAGTTAAAACAAAATCAAATAAGCCTATATTTAAGCCTATCTTA  
GCTTTTCTCAAAGCTATAAAAATGAAGAATATCGATATCTTTTTTAAATGTCAACAC  
TTAAATCCCATAAAAATCATTAAAATAAGAAAAATCTAAGCTTCTACCGATAATTA  
AGGATATTCAATTACAAAAAAAATGCCCATTAATTAACAATCCGTTTAATTA  
ATGGGCATTTGCTTTCTATTTTGTGTAATTAGGAATCTAATAATAATTCATTTAGC  
CCTTTCACAAAACCTGGCAGGGTCTTTAAGCTGCTCTCCTTCAGCTAGGAGCGCTT  
GATTAAGCAATAAATCGGCCAACGATTAAAGCGTGTTTTATCAGATTCATTTTT  
CACCCGTAAAATTAAGGGGTGCGATGGATTAATTTCTAAAATAGGTTTTGCCTGC  
ATGAAATCCTGACCCGTTTGAATTAATAATCGCTAGCCAACCTCCCTTCTTTCCA  
ATCCACTGTCCCTGCGAGATCACGTAATCCTTAAATCCTGTAAATCTTTACTAGT  
AATTCTAGTTCTTCTACTTCCACTGTTACTCCTCAGCCTTGTCGGTAAAATGCTCG  
ACAAGCCAATCGACTTCTTCCGGCGATGTAATAATGAATAATTACTTTACCTTCCC  
CTTTCTCATTAATATTGATCGCAATCTTTGAAGACAAGCTTCTGGATAATTGATTG  
ACCCATCCCTGGACCTCGTCAGCATAGGGCGCGGGCTTGGTTTTCTTTCGGTGTCTT  
AGCGAATTGCACTAACTTTCCGCTTCACGAACTGTTAAATTTTTATCAATAATCT  
TCTGCGCAAATAAGATTTGTTGATCCTTTGGCAGCGTTAACAATGCTCTCGCGTG  
GCCATTTCTAGTTTATCCGTTTGTAACAAAACCTTAACAGAATCGTCAAGAGAA  
AGCAGTCGCAAATATTGGTTACAGCGGTACGCGAACGTCCAACGTGTTCCGAAA  
TCGCAGCGTGTGACATAGAGAATTCGTCCCTTAAACGAGAAAAAGCAAGCGCCT  
CATCAATTGGATTTAGATTTTCCCGTTGTATATTTTCAATAAGCGCAAACGCTAAT  
GCTGTAGTATCATCAACATTTCTGATAATGGCAGGTACTTTTTTTAACCCTGCTT  
TTTCGCTGCGCGCCAGCGTCTTTCTCCCGCAATGATTTTATATCGATTGGTTTGAA  
TTTGACGTACAATGAGTGGTTGTATAATGCCTTGAGATTTAATTGAATTCACAAG  
CTCCTGTAAAGATTCTTTTATCCAACCCTTTCGGGGCTGATATTTACCCGTCTGTA  
GTAAATCAATGGAGAGAAAAATATAAATTTGAGCAACGAAATCGTTTGTTTTAGA  
GGCGTTCGTAATGACTTCAAATCCCTTAGACCTTTAAGCCTTTCAATTCTATAT  
CAGCCATTATTTTTCTTTCAATACATTTACGTTATCGCGTACCGCAAACGTCTCC  
TCCATCCTGCAAATGTCTCAACCAGCAAGAACTCCTTTCAATTTCAATACCGCAA  
ACGTCTCGCTTTATCCTGCAAATGTCGCATATCAACCCGCAAACGTGCTTCTCTAT  
CCTGCTAATGTCTCTTAAAAGTTTTCAAGATCATGAAAATTAAGCAATTAATAAA  
TTGTAAACAACAGAACTAATTAAAAAAATTAAAACACGTTGTGTTTCTTTTGTA  
AATAGAACTTCATAAAAAAGTTGCATTTTATAAAAAACCAGATATTTTTTAAA  
AAGGATGAAATAATTCATAGTTTACAAAGGAACCTCGTCATGCTAGAAACACAAA  
TTACCCCTACGGTACAGAAACCCCGAACAATTAATGGACAAATTCTACCAAGC  
TGTAACGAAATGCTATTAACACTTCGAAATTATATTACTAGCCAGATAAAAAGA  
AAAAAATCTCGGACGTGGGGTGCATAGAAAGCTGCGAAAATGGTTGGAGTCTCC  
GCGCCTACTTTCAGAAAACCTATTGGAATCCGATAACGAAGTTCCTGGAATCATAA  
TTGAAGAAAATGAGAACGGAAGGAAAATAAAAAAGTACACGCTTACTGCGATTA  
ACAATTTGCGTGAAAAGGCAAAAACCCGTTACAAGCGCCCTAAAGGCTCTAAAC  
CATTAAACAATAGCAATATCGAATTTAAAGGGCGGCGTCCGGAAAACAGAAACGG  
CAGTTGATTTAGGTAAAAAATAGCCATTGAAGGCTTACGTTCCCTCCTTCTCGA  
CTTTGATGCTCAAGGCACAGCAACCCTTATAAGCTCAGGACTGATCCCTGACTTA  
GAATTACGTTACGAAGACACGATTACCAACACTTTAATTTTACGATCCGAACAACA  
TTAAGAATATCGTTCTTAAAACACATTTTGTGTTTTCGATATTATTCTGCCAAT  
CTAGCGATAACAAGATTGCGATTTAATCCTCCCAAACGATAAAGAAAACAACAAC  
GACCGTTTAGGTTCTCCTTTTCTAAGGTTGGCAGAGTCTCTAAAATAAATTA  
ATCAATATGATGTAATACTTATTGATTGTGGTCTTAATTTGGGATTACTCACATTA  
AACGCCATTATTGCTTGTGATGGCATGATTATTCTATTCCGCCAGCATGAATGA  
TACTCAAGCTTCATCATGTACACAGCAACTTTACGTAATATGTTTAGAGAATTAT  
CGAACAAAAGTTGGACTATTTGAGAATACTTCTATCAAAGCACAAACAGCAGCA  
ATGAGGCTCTGCAAATGGAAAATATGATGCGCGAGCAATTTGGCCGGTATATTCT  
TTCTAACCATATGTGTGAGACTGTTGAAGTATCGAAGGCGGCAAATGAAATAGG  
AACGATCTATGATGTATCAAACCACGAGGAAGTCGAGAGGCTTATCGTAGAGC  
CCTTCAACACCTTGACGATGTCAACATGGAAATAATTAATAATTTTAAAGACATA  
TGAAAAGCCAAGTAAAAGTGCTAACAACTTTAGGAGAAACCGTCAATGGATAA

CAGCAAGCGAAACATTCATAACTCTGGACCGTTAGGTATGTTAATGAAAAATGGC  
CAGATTAATAAAATTGAAAATTCAGCAGAATCTAACGAAGGTACCGTCGTATTA  
AATAAAGCAGCACCCCTCCTATTTCAAACACAAGCGGGGATTGAGTTTACCGAAC  
ATGAATTGATCTTTGTGGATCCAAAAGAATGTGAGCCCTGGGAGTATGCTAATAG  
ACAAGATGAGGAACTTGGCAATATAAACGAATTAATCGAATCAATTAATCAAA  
TAAACAACACTACAGCCAGCCCTTATTCGGAAACACCCCTCACCCACATGATGACGTT  
AAATATGAAATTATTTTCGGTCGTCGACGACATATAGCCTGTCTTAACCTTGGTAT  
CCCATTTTTAGCGATTCTCAAAGAGATTCTAATGTTCAAGATGCAATCGCTTTTC  
AAGACGCAGAAAATAAACTTAGGAACGACGTCAGCAATTATTCAAACGCCATAC  
TATACAAACGTTTGATAGAAGAAGGGGTTTTCAAAGGAAAAAGACCTCGCCG  
AGAAATTGCGATTATCGCCTTCTACCTTGAATGATTTGATGGCGTATACAAAGAT  
ACCAAGTGCTATTGTCAAAAAATTCCAAACATCCATGCGTTGTCCAAAAGCATT  
GTGCTTAAAATAGTTCAATTACTCAATAAATCTTCAAAAAATCACGCAAACTTA  
TTGCTATTGCACCAGATATTGGTAAGTCCATTACTTCACCGGCTAAACTTGAAAG  
TGCTGTGCAAAAACCAGTAGGCAGCAAAAACAAAACAGCGGTTGCAGGCAACTAA  
ACAATATAAGACTAAAGATGGGAAAAAGCTTTTTACGTTTAAAATTGATCATCGA  
GGCGCGCCTTGCATTGTTTTGAATAAAGAAATCCTCAACAGGGTAGATATGGATA  
CCATGTGTGAGAAAATTAAGCCAACTAGAAATTGAATTAAGTCAATCCGGAG  
CTCCGGATTGACGCCAATCCGGAGCTCCCGGATTGGAGCTTGAGCCAAATATTG  
ATGGAGAAACGAATGAATTTGGCTGTGGCTACGGACAAAAGAGTCGAACTGAAA  
AAGCATGTCAATGCTATTCATTGTTCAAATAACCTTACTTTGGTGCAAAGAAAGT  
TATTCAATGCACTTTTATTTAATGCTTATCCAGAGTTACCCTACAAGCTCAAATTT  
CAAATTTAGCAAAAAGATTTATGCAAATTAATAGGATATAACAGCAATGACTATG  
GAAAGCTTAAAAGGGCGCTACTTGGGTTAATCACAACCGCAATTGAATGGAATG  
TAATCGATTGTGACACAGGGAAGGAAAAAATTGGAAAGCAAGTTCAATCCTAT  
CAGCGGCTCAGCTGGCGGAAGGCGTTTGTACTTATGAGTACAGTCATATTATGAA  
AGAATTGCTTTTCCAGCCGGAAATTTATGGAAGAATAGATGTAAAAACCATGTCA  
AAATTTAAATCAAGCTATGGTTTAGCATTATATGAAAACGTATTTCGCTACCAGA  
GACTGTCACAGACACCTTGGTTTCCTTTAGATGTTTTTAGAAAACCTCATGGGAGTT  
TTAGGCGGTAAATACACTTCATTTAAAGATTTTAAAAAAGAGTACTCAATATTG  
CAGTGAATGAGGTAAATAACCTATCACAATTCAGGTCTTACCAGAAAATCGAGA  
GACAAAACCAAAAAGTCACAAAGATTAGATTTAACTGAATAAAAAACACCTTG  
CGTCATCCGAAAAAATCTCAAACCTAATTAATGCAGAGTTAGAAGAAACCTAAC  
AAATACATTTAGTCTATCTCCGCTTCTTATTTCGAGATTTGCTTACAGAGTATGATA  
TAGCGTTCATTTCGTGAAAAAGTGAACATCATTATAAATTCCAGTAGTTTTCAAGA  
AGGGAAGATACGCGGCCTTAGTGGGTATTTAATAGACTCATTACGAAAAGATTAT  
AAAGCCAGCAAGTCGAGCCAGATGCTTATTAGTGAAGCACGAATGAAGAGGAAA  
TTAGAAGAAGAAGCTGAGAAAGAAAGGGAAGAAAGACGAAGAAATAGATATGA  
AAAATACGTTAAGGATAAAAATAACAAATATCTTACATTACTAACGGATGCTGA  
GAAGGATGCTCTAGTGATGGATTTTGGAGTTGAATTGAAGTCAAATAAAAGTAAT  
AAAGTCTTTTACTCTTGGTATAAGAAAAATGGTTTTGAGCATGTTGGGGTTAAAG  
CTTGCTTTTACAATTTTGTGAAAGAGCATAAAAAACAGCATATGGGAGGAATTCT  
GTCATTTGAAGAGTTTATAAGCTTGGTGGATGAATACACTTAATAGACAGGCGCG  
ACGTTTTCGGGACGGGAAATTCAGATTCGCGAGGGGGGACGTTTGCAGGATGTT  
CTTTTGGAGACTTTATCGAAATATTAATCCTCAAAGTTACATCTTGTCTTTCT  
TCAAACGACTTTTAAAGTTCTTCATTAGAATTACTAGCGGCTTCATAAAGCTTGAG  
GTATTGTTCCGCGCGTCGTTTATATTCTTTAACCAGCGAGCTGAGCTTGCAAACCGG  
TCTGGTAAATTTTAGCCAGTATCGCTTCAATTGCTGTGGATTATCAGGCAGCGA  
ACGAATCGCCTCGGGAAGGGGTGTTGGTGCATATTTTCGGATTGAAAAAAGTGA  
GGGGAAGCGTTTTAACTTCTCTTTGAGCCGTTCAATTTCTCTTTGAGAGTAAA  
AAATTCGTGCAAAGTACCTTGGGTGATTTCTCAAAGATTTCGTGCACGCGCTTTG  
GCCATGCGTTGACGCTCATTCCAGGGCTCTGGGTATTCTTCAGCCGCGGCTTGAA  
CCATCGCTTCAAATCGTTTTTTGGCGTCCGCGCGCACTTGGAGCTCGAAACGAAC  
CAATCCTTTGTTGGCTTGCGAACGCCGGTATTTTTTTGGGCATTGGGTTTGTGGC

GCGTCGGAATTGATTTGATTTTATCCATACCATTTTTATCCTTTTTACCCGGAGAT  
AATATAGCAGTTTTTAGATCGGTTGAGGAGGACAGCGATTCTACAAAGAAT

**S4 Table. Primers for PCR Identification**

| <b>Primers</b>         | <b>Sequences (5'-3')</b>                        | <b>Target genes</b>    |
|------------------------|-------------------------------------------------|------------------------|
| cbua-01F<br>cbua-01R   | TGAAAGACAGTCTCATTACCT<br>GAAATGTTTCCAGGACTTGC   | CBUA0001               |
| cbua-03F<br>cbua-03R   | TTGGTGAGTCGTCAGTATTTTG<br>TTACACATTTTAAATACAAGC | CBUA0003               |
| cbua-05F<br>cbua-05R   | TAAGAACACGTTAGTAGAAGAG<br>GTTTTAGAACGTGGCAAGGT  | CBUA0005               |
| cbua-06F<br>cbua-06R   | TGTTTGCAACTGTTCCATCCT<br>TGATGTTGATGGCGCAGACTC  | CBUA0006               |
| cbua-07F<br>cbua-07R   | TTGCAGGGACTGTGTGTAACG<br>CTAACTTCTATTGGCTCTCTTC | CBUA0007               |
| cbua-08F<br>cbua-08R   | ATGAATAATAACTTGGAAAATG<br>TTCGCCACTTTTCCCTGTAAT | CBUA0008               |
| cbua-08aF<br>cbua-08aR | AATCAAGTTGCTATTAGGGTGT<br>CATCTTCATTCCACGCCTTAC | CBUA0008a              |
| cbua-08bF<br>cbua-08bR | TCAATAAGTCGTGAGCAATCC<br>ATCGTAGCGTTGCGTCACAC   | CBUA0008b              |
| cbua-08cF<br>cbua-08cR | GGAATTAACCCTTATGCGTAT<br>CGTTAGCGCCTCGTCATTAC   | CBUA0008c              |
| cbua-10F<br>cbua-10R   | TTGATGCCGTTCTCTTAGTTC<br>CTATTGAAAATATCACTGCTGG | CBUA00010              |
| cbua-11F<br>cbua-12R   | AGTGATATTGGCACAACGATG<br>AACGTTCCCTCGGCAAGACT   | CBUA0011~<br>CBUA0012  |
| cbua-13F<br>cbua-13R   | ATGCCATATTTTTTTTACACTAC<br>GAAAACAGTTGTTATTAGTG | CBUA0013               |
| cbua-13aF<br>cbua-14R  | TAATTTATTAGGGTGCTTGC<br>GCTCAAATTCCGCACCTACT    | CBUA0013a~<br>CBUA0014 |
| cbua-15F<br>cbua-15R   | TTTGAGCGATGTAAATGACTAT<br>ATTCTCTTCAGTTTCCGTTTC | CBUA0015               |
| cbua-16F<br>cbua-16R   | ATGAGATTAGAACAACCAAG<br>TGTTCATTTTCTGAGTCCGAG   | CBUA0016               |
| cbua-17F<br>cbua-17R   | GAGAAAAAATGTCACGAGAG<br>CCCTTTCCTCTATGCGTTCT    | CBUA0017               |
| cbua-18F<br>cbua-18R   | AGGATACGATGGTTCTTGTG<br>GAAGCATGAAAGCAAAGTATC   | CBUA0018               |
| cbua-20F<br>cbua-20R   | ATCGATTTTTCGTGGTTCTC<br>TCTTGAAGCTTACCAAATGC    | CBUA0020               |
| cbua-21F<br>cbua-21R   | GTTTCTTTGCATTGCTGTTG<br>GAAGTATATGGGTATCAAAGTG  | CBUA0021               |



|                        |                                                     |           |
|------------------------|-----------------------------------------------------|-----------|
| cbua-22F<br>cbua-22R   | CTACAATGCGCCTATGGAC<br>CTATGCGTTATCCACTGTTTC        | CBUA0022  |
| cbua-23F<br>cbua-23R   | CCCTCATTTTGGTATTTTCG<br>CAATTGTGCTATTGAGGAAAC       | CBUA0023  |
| cbua-24F<br>cbua-24R   | AGCAGCGCATTTAATCTTCT<br>GTGGGGCACATCTACTTTC         | CBUA0024  |
| cbua-25F<br>cbua-25R   | GAAATTCTTTCCTCTTTGTAGC<br>TTGAATAAGCCAAATGATG       | CBUA0025  |
| cbua-26F<br>cbua-26R   | TGATTGTCTATCGAAGCCTAG<br>GCATGGGAGAATGAGCAGTC       | CBUA0026  |
| cbua-27F<br>cbua-27R   | GAAGGCCTTTTCTATCAACG<br>TTAAACCTTTATCGCCATTG        | CBUA0027  |
| cbua-28F<br>cbua-28R   | CACCTCTATCAGTTCGCCTAT<br>TGACTGATGGAAATCTGCTC       | CBUA0028  |
| cbua-29F<br>cbua-29R   | CACCCAAACAGCTCACGATC<br>CGTGGGAAATCGGTGAGGT         | CBUA0029  |
| cbua-29aF<br>cbua-29aR | CAGCAAATAAAGATGGACT<br>GGAATATCCGTGATTGCCTC         | CBUA0029a |
| cbua-31F<br>cbua-31R   | GTCAATTTTTGGATTTCACATAG<br>TTATCTTCCATACAAATTCATC   | CBUA0031  |
| cbua-32F<br>cbua-32R   | ATGGAAGATAACTGCATTAATAAT<br>TTATTTTATCCAAATACAGTTAG | CBUA0032  |
| cbua-33F<br>cbua-33R   | ATGAATCCTAAAGATTTACTCTAT<br>AATTATCTTTCCCCCCTTCTAC  | CBUA0033  |
| cbua-34F<br>cbua-34R   | TCAACATTTTATCATCAGAGG<br>TTGGGCGCTTACTTTAGGC        | CBUA0034  |
| cbua-34aF<br>cbua-34aR | TTCACTCGCTGAAAAACCTTC<br>AAAGTGGGCAAATTGGTTCG       | CBUA0034a |
| cbua-36F<br>cbua-36R   | TGTTACTCCTCAGCCTTGTCG<br>GTACGCGATAACGTAAATGT       | CBUA0036  |
| cbua-37F<br>cbua-37R   | AAACACAAATTACCCCCTACG<br>GTTATCCATTGACGTTTCTCC      | CBUA0037  |
| cbua-38F<br>cbua-38R   | AGCGAAACATTCATAACTCTG<br>TGACTTAATTCAATTTCTAGTTG    | CBUA0038  |
| cbua-39F<br>cbua-39R   | CCAAATATTGATGGAGAAACG<br>AGTGTATTCATCCACCAAGC       | CBUA0039  |
| cbua-39aF<br>cbua-39aR | TTAATCCTCAAAGTTACATCT<br>TAAAATCAAATCAATTCCGAC      | CBUA0039a |
